# Supplementary material
Source: publisher figshare collection journal article supplement (https://aacr.figshare.com/articles/dataset/_/22403267)
Supplement: Supplementary file 1 [file 39849071]

A

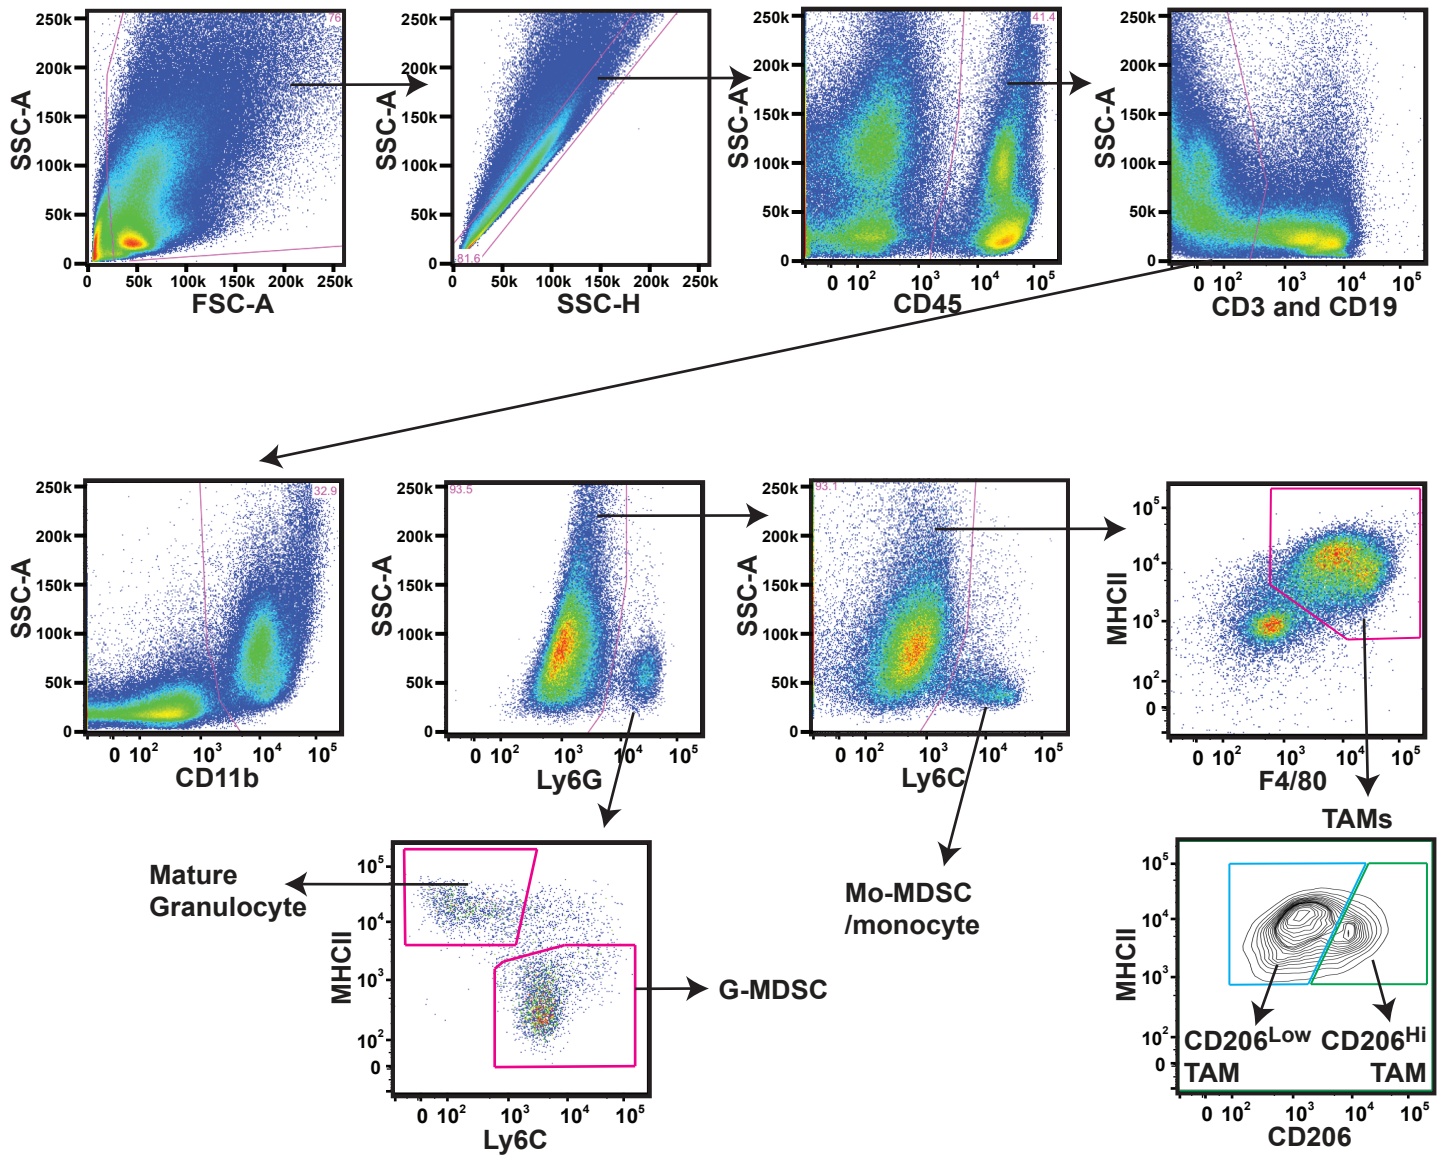

B

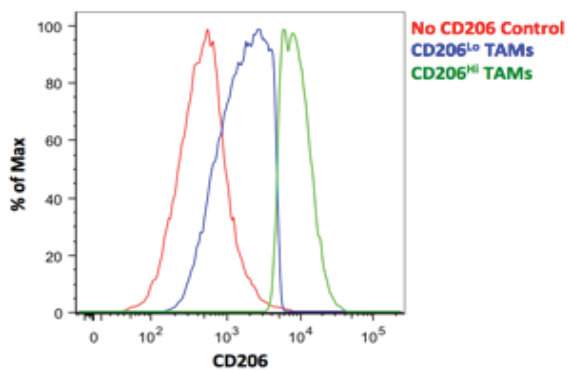

**A**

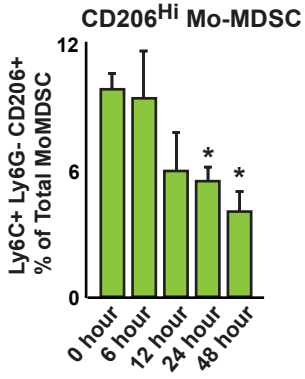

**B**

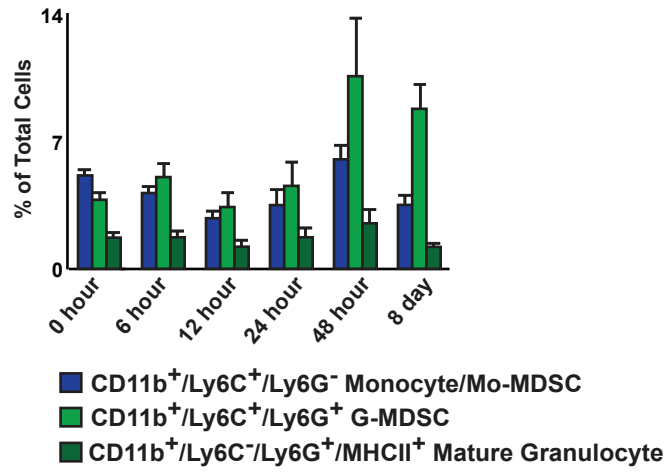

**C**

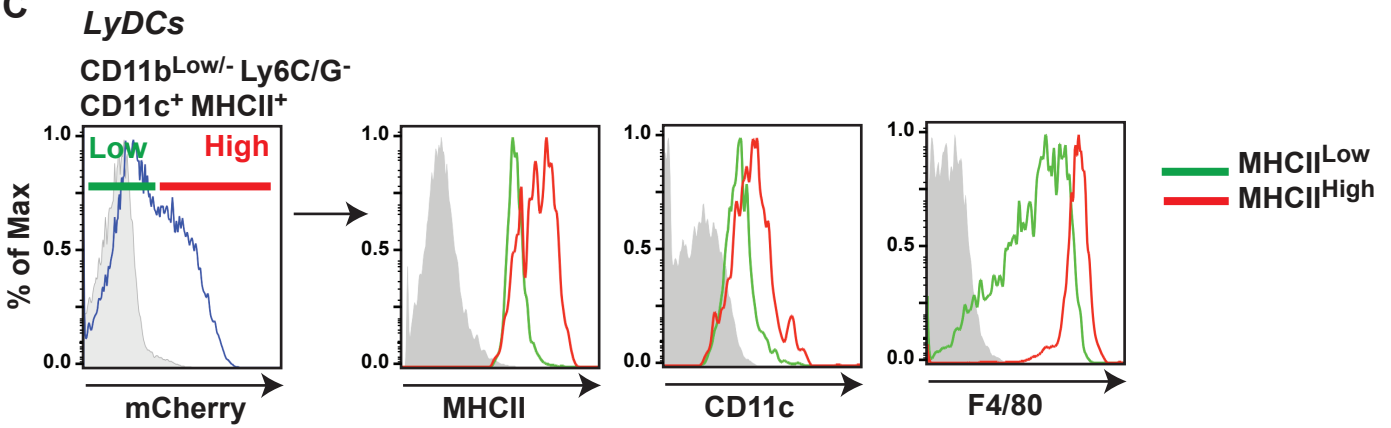

**D**

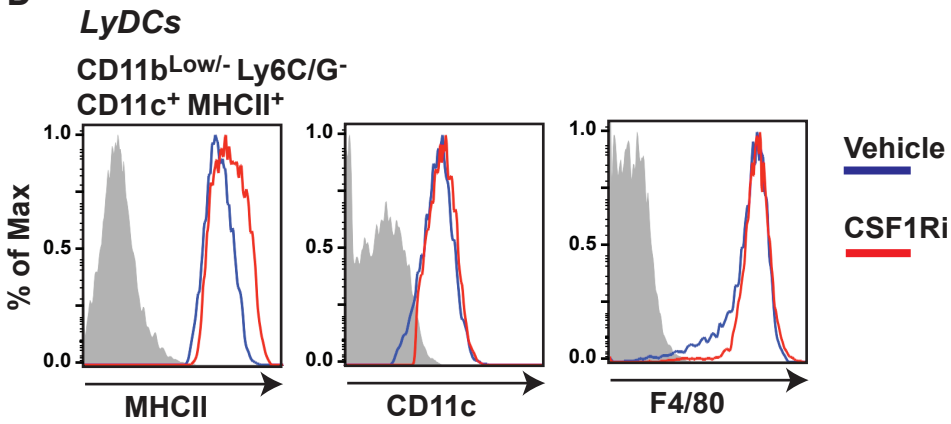

**E**

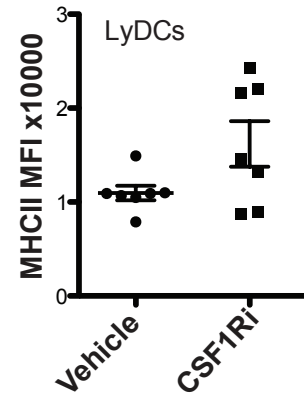

Zhu et al. Figure S3

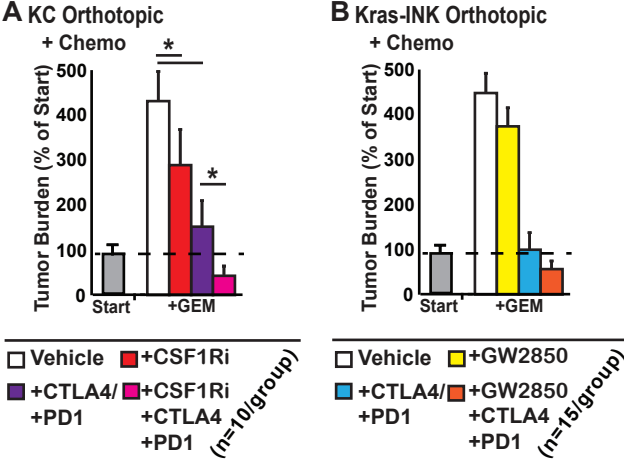

**Figure S1. Flow cytometric analysis of leukocyte infiltration in orthotopic PDAC tumors.** **A)** Representative FACS plots with gating strategy to identify mature granulocytes (CD11b<sup>+</sup>Ly6G<sup>+</sup>Ly6C<sup>-</sup>MHCII<sup>+</sup>), G-MDSCs (CD11b<sup>+</sup>Ly6G<sup>+</sup>Ly6C<sup>+</sup>), Mo-MDSCs (CD11b<sup>+</sup>Ly6G<sup>-</sup>Ly6C<sup>+</sup>), and CD206<sup>Lo</sup> and CD206<sup>Hi</sup> TAMs (CD11b<sup>+</sup>Ly6G/C-F4/80<sup>+</sup>MHCII<sup>+</sup>). **B)** CD206 expression in TAM subsets designated CD206<sup>High</sup> and CD206<sup>Low</sup>.

**Figure S2. CSF1 blockade depletes CD206<sup>+</sup> Mo-MDSCs and upregulates MHCII expression in Lymphoid DCs.** **A)** Frequency of CD206<sup>Hi</sup> Mo-MDSCs in orthotopic KI tumors from mice treated with aCSF1 for 6 hours to 8 days. **B)** Frequency of Mo-MDSCs, G-MDSCs, and mature granulocytes in KI tumors from (A). **C)** Flow cytometry analyses of MHCII, CD11c, and F4/80 expression in mCherry<sup>Low</sup> and mCherry<sup>Hi</sup> tumor-infiltrating LyDCs from mCherry<sup>+</sup> KI tumor-bearing mice. Representative plots from 5 mice are depicted. **D)** Flow cytometry analyses of MHCII, CD11c, and F4/80 expression in tumor-infiltrating LyDCs from orthotopic KI tumors following vehicle or CSF1Ri treatment. **E)** MHCII expression in tumor-infiltrating LyDCs from mice in (D) is quantified as MFI.

**Figure S3. A-B)** Mice bearing orthotopic KC (A) or KI (B) tumors were treated with vehicle, PLX3397, GW2850, +/- GEM +/-  $\alpha$ PD1 and/or  $\alpha$ CTLA4. The tumor burden is displayed as mean tumor weight (n=10-15) compared to that of 5 mice sacrificed at the start of treatment (“Start”).

Supplemental Table 1

| PROBE_ID     | SYMBOL         | p-value | q value | Fold Change |
|--------------|----------------|---------|---------|-------------|
| ILMN_2742861 | Serpina3f      | 0.0077  | 0.1682  | 3.12        |
| ILMN_2426853 | Ubd            | 0.0129  | 0.1951  | 3.03        |
| ILMN_2808485 | Gbp10          | 0.0038  | 0.1375  | 2.57        |
| ILMN_3142803 | Cxcl10         | 0.0250  | 0.2451  | 2.55        |
| ILMN_2944666 | Ifit3          | 0.0142  | 0.1995  | 2.54        |
| ILMN_1218547 | Dlml1-pending  | 0.0026  | 0.1185  | 2.45        |
| ILMN_2918002 | Gbp3           | 0.0092  | 0.1781  | 2.42        |
| ILMN_2445477 | Wars           | 0.0013  | 0.0885  | 2.40        |
| ILMN_1246201 | Cacna1h        | 0.0007  | 0.0698  | 2.35        |
| ILMN_2661214 | Krt17          | 0.0092  | 0.1784  | 2.30        |
| ILMN_1250443 | LOC667597      | 0.0009  | 0.0782  | 2.27        |
| ILMN_2649068 | Irf1           | 0.0095  | 0.1810  | 2.27        |
| ILMN_1244513 | Gbp3           | 0.0103  | 0.1838  | 2.26        |
| ILMN_1226800 | Cd274          | 0.0177  | 0.2144  | 2.23        |
| ILMN_2593554 | Iatp           | 0.0121  | 0.1906  | 2.20        |
| ILMN_2649067 | Irf1           | 0.0253  | 0.2457  | 2.19        |
| ILMN_1244169 | Sftpd          | 0.0018  | 0.1002  | 2.16        |
| ILMN_2632567 | C4b            | 0.0004  | 0.0554  | 2.15        |
| ILMN_2624100 | Irf1           | 0.0089  | 0.1750  | 2.15        |
| ILMN_1253919 | Ccl3           | 0.0141  | 0.1995  | 2.13        |
| ILMN_2754158 | Tatp           | 0.0129  | 0.1951  | 2.12        |
| ILMN_2655721 | Stat1          | 0.0197  | 0.2223  | 2.07        |
| ILMN_1250913 | 9930023K05Rik  | 0.0007  | 0.0705  | 2.05        |
| ILMN_1234539 | Iram1          | 0.0083  | 0.1725  | 2.04        |
| ILMN_1247185 | LOC100047316   | 0.0055  | 0.1522  | 2.03        |
| ILMN_2487554 | A330042121Rik  | 0.0049  | 0.1457  | 2.03        |
| ILMN_1238847 | Cd3e           | 0.0175  | 0.2134  | 1.99        |
| ILMN_1244866 | Gbp5           | 0.0055  | 0.1522  | 1.99        |
| ILMN_2763245 | Cxcl1          | 0.0064  | 0.1614  | 1.98        |
| ILMN_2668333 | Prr4           | 0.0212  | 0.2297  | 1.97        |
| ILMN_1246194 | LOC667370      | 0.0026  | 0.1177  | 1.97        |
| ILMN_1259564 | Iigp2          | 0.0029  | 0.1239  | 1.97        |
| ILMN_2996973 | LOC225594      | 0.0161  | 0.2067  | 1.95        |
| ILMN_2803921 | Ly6d           | 0.0268  | 0.2479  | 1.95        |
| ILMN_2741169 | Cd8b1          | 0.0106  | 0.1838  | 1.95        |
| ILMN_1220577 | LOC636752      | 0.0049  | 0.1457  | 1.94        |
| ILMN_2458792 | scf0002547.1_9 | 0.0106  | 0.1840  | 1.94        |
| ILMN_1230458 | Ifit3          | 0.0011  | 0.0809  | 1.94        |
| ILMN_2784580 | Cd3e           | 0.0177  | 0.2144  | 1.93        |
| ILMN_1230143 | Batf2          | 0.0270  | 0.2486  | 1.93        |
| ILMN_2860645 | Gbp6           | 0.0126  | 0.1930  | 1.92        |
| ILMN_1257046 | C1s            | 0.0042  | 0.1400  | 1.90        |
| ILMN_1228653 | Zbp1           | 0.0029  | 0.1242  | 1.90        |
| ILMN_2534207 | LOC380706      | 0.0234  | 0.2399  | 1.90        |
| ILMN_2663230 | Sico3a1        | 0.0002  | 0.0405  | 1.90        |
| ILMN_2593196 | Stat1          | 0.0273  | 0.2488  | 1.90        |
| ILMN_2632563 | C4b            | 0.0021  | 0.1071  | 1.90        |
| ILMN_3054914 | Usp18          | 0.0024  | 0.1139  | 1.87        |
| ILMN_2796382 | Cdsn           | 0.0158  | 0.2067  | 1.86        |
| ILMN_1240864 | Tyki           | 0.0008  | 0.0727  | 1.85        |
| ILMN_2725927 | Serpina3g      | 0.0160  | 0.2067  | 1.83        |
| ILMN_2609897 | Prss35         | 0.0006  | 0.0670  | 1.83        |
| ILMN_3131679 | Usp18          | 0.0006  | 0.0675  | 1.82        |
| ILMN_3077377 | Wars           | 0.0019  | 0.1026  | 1.82        |
| ILMN_2673233 | Pfkfb          | 0.0008  | 0.0726  | 1.81        |
| ILMN_2479290 | Fas            | 0.0021  | 0.1062  | 1.80        |
| ILMN_2458671 | Vldlr          | 0.0204  | 0.2259  | 1.80        |
| ILMN_3103746 | Tnfrsf9        | 0.0011  | 0.0814  | 1.80        |
| ILMN_2636339 | Irf9           | 0.0071  | 0.1642  | 1.80        |
| ILMN_2791459 | Ifng           | 0.0098  | 0.1828  | 1.80        |
| ILMN_3122961 | Gbp2           | 0.0178  | 0.2153  | 1.79        |
| ILMN_1255860 | Klrd1          | 0.0138  | 0.1982  | 1.78        |
| ILMN_1213708 | 4732462B05Rik  | 0.0160  | 0.2067  | 1.78        |
| ILMN_2686721 | Tap2           | 0.0069  | 0.1637  | 1.78        |
| ILMN_1224472 | Ccl4           | 0.0263  | 0.2477  | 1.78        |
| ILMN_2627179 | Eli3           | 0.0007  | 0.0711  | 1.77        |
| ILMN_1230878 | H2-T10         | 0.0266  | 0.2479  | 1.77        |
| ILMN_1243992 | Ptfr           | 0.0053  | 0.1484  | 1.77        |
| ILMN_3049559 | C4b            | 0.0068  | 0.1637  | 1.77        |
| ILMN_2804037 | Irgm1          | 0.0025  | 0.1177  | 1.76        |
| ILMN_2667269 | C1s            | 0.0128  | 0.1947  | 1.76        |
| ILMN_2902979 | Fas            | 0.0151  | 0.2037  | 1.76        |
| ILMN_3156343 | Wars           | 0.0014  | 0.0928  | 1.76        |
| ILMN_1217855 | Nka7           | 0.0165  | 0.2080  | 1.75        |
| ILMN_1228333 | Prr1           | 0.0005  | 0.0648  | 1.74        |
| ILMN_1228404 | Sh2d2a         | 0.0271  | 0.2486  | 1.74        |
| ILMN_1235735 | Sico3a1        | 0.0076  | 0.1664  | 1.73        |
| ILMN_2648169 | Sfn            | 0.0227  | 0.2358  | 1.72        |
| ILMN_3120510 | Gvin1          | 0.0274  | 0.2488  | 1.72        |
| ILMN_1223949 | Cldn4          | 0.0159  | 0.2067  | 1.71        |
| ILMN_2504544 | mt-Nd5         | 0.0000  | 0.0212  | 1.71        |
| ILMN_2455771 | LOC100044411   | 0.0000  | 0.0212  | 1.70        |
| ILMN_2599154 | Oasl2          | 0.0121  | 0.1906  | 1.70        |
| ILMN_2661289 | Csprs          | 0.0019  | 0.1028  | 1.70        |
| ILMN_2954868 | Oasl2          | 0.0053  | 0.1491  | 1.70        |
| ILMN_1237695 | Pfkfb          | 0.0015  | 0.0935  | 1.69        |
| ILMN_2599782 | Irf1           | 0.0209  | 0.2286  | 1.69        |
| ILMN_1230266 | A830006J06Rik  | 0.0072  | 0.1648  | 1.69        |
| ILMN_2659503 | Cdh13          | 0.0006  | 0.0662  | 1.68        |
| ILMN_2646618 | Fn1            | 0.0004  | 0.0594  | 1.68        |
| ILMN_2954474 | Enpp2          | 0.0209  | 0.2286  | 1.68        |
| ILMN_3014753 | Ifi202b        | 0.0034  | 0.1338  | 1.68        |
| ILMN_3060966 | Als2cr4        | 0.0096  | 0.1818  | 1.68        |
| ILMN_2834777 | Irf1           | 0.0064  | 0.1614  | 1.67        |
| ILMN_1215092 | C4a            | 0.0229  | 0.2375  | 1.67        |
| ILMN_2648100 | LOC676974      | 0.0003  | 0.0542  | 1.67        |
| ILMN_1259424 | Zfp288         | 0.0042  | 0.1400  | 1.66        |
| ILMN_2769261 | Erc5           | 0.0193  | 0.2206  | 1.66        |
| ILMN_2974611 | Tapbp1         | 0.0068  | 0.1637  | 1.66        |

| PROBE_ID     | SYMBOL        | p-value | q value | Fold Change |
|--------------|---------------|---------|---------|-------------|
| ILMN_2711075 | Mmp9          | 0.0000  | 0.0032  | -8.33       |
| ILMN_2711163 | Ctsk          | 0.0000  | 0.0103  | -8.18       |
| ILMN_1249030 | Mpo           | 0.0047  | 0.1441  | -7.77       |
| ILMN_2766604 | Camp          | 0.0050  | 0.1463  | -7.56       |
| ILMN_2600421 | Mpo           | 0.0051  | 0.1466  | -6.47       |
| ILMN_2770968 | Fcrls         | 0.0000  | 0.0172  | -6.28       |
| ILMN_2625125 | Cx3cr1        | 0.0000  | 0.0000  | -5.81       |
| ILMN_2710905 | S100a8        | 0.0056  | 0.1526  | -5.27       |
| ILMN_2803674 | S100a9        | 0.0114  | 0.1873  | -4.98       |
| ILMN_3161805 | CCL12         | 0.0001  | 0.0325  | -4.62       |
| ILMN_2771766 | LOC100048556  | 0.0002  | 0.0405  | -4.62       |
| ILMN_2631712 | 1810009J06Rik | 0.0104  | 0.1838  | -4.53       |
| ILMN_1228832 | Ngp           | 0.0092  | 0.1784  | -4.35       |
| ILMN_2625377 | Rgs1          | 0.0003  | 0.0542  | -4.35       |
| ILMN_1255047 | Nhedc2        | 0.0001  | 0.0223  | -3.94       |
| ILMN_2897891 | Rgs1          | 0.0001  | 0.0382  | -3.84       |
| ILMN_1220236 | Ctsq          | 0.0126  | 0.1935  | -3.44       |
| ILMN_2831436 | Msr2          | 0.0000  | 0.0212  | -3.38       |
| ILMN_1221700 | Ela2          | 0.0117  | 0.1882  | -3.35       |
| ILMN_2663249 | Slamf9        | 0.0003  | 0.0551  | -3.33       |
| ILMN_1224754 | Ckb           | 0.0012  | 0.0862  | -2.99       |
| ILMN_2925094 | Mpo           | 0.0088  | 0.1750  | -2.98       |
| ILMN_2789900 | Cd177         | 0.0162  | 0.2074  | -2.77       |
| ILMN_3091003 | Ms4a7         | 0.0002  | 0.0405  | -2.68       |
| ILMN_2596596 | Rgs1          | 0.0050  | 0.1463  | -2.67       |
| ILMN_1239430 | Mrc1          | 0.0000  | 0.0032  | -2.66       |
| ILMN_2891767 | Aqp12         | 0.0270  | 0.2485  | -2.65       |
| ILMN_2758029 | Prtm3         | 0.0148  | 0.2030  | -2.61       |
| ILMN_2776431 | C1qa          | 0.0006  | 0.0662  | -2.60       |
| ILMN_2979432 | Klkb1b11      | 0.0258  | 0.2466  | -2.59       |
| ILMN_2640346 | P2ry13        | 0.0000  | 0.0066  | -2.58       |
| ILMN_2914938 | F13a1         | 0.0007  | 0.0711  | -2.56       |
| ILMN_1255140 | Nhedc2        | 0.0015  | 0.0935  | -2.55       |
| ILMN_2715840 | C1qc          | 0.0002  | 0.0458  | -2.50       |
| ILMN_2624630 | Fcnb          | 0.0011  | 0.0814  | -2.44       |
| ILMN_1241695 | Ms4a6d        | 0.0000  | 0.0157  | -2.42       |
| ILMN_2675223 | Cd33          | 0.0000  | 0.0169  | -2.41       |
| ILMN_2619620 | C1qb          | 0.0004  | 0.0554  | -2.41       |
| ILMN_2798129 | C6            | 0.0010  | 0.0795  | -2.39       |
| ILMN_2959372 | Clec4b1       | 0.0002  | 0.0405  | -2.39       |
| ILMN_2500157 | 4733401I05Rik | 0.0000  | 0.0066  | -2.37       |
| ILMN_2735961 | Tlr13         | 0.0000  | 0.0066  | -2.32       |
| ILMN_2804487 | Aif1          | 0.0091  | 0.1775  | -2.30       |
| ILMN_1257444 | Slc37a1       | 0.0016  | 0.0943  | -2.30       |
| ILMN_2705860 | Tpsab1        | 0.0083  | 0.1730  | -2.29       |
| ILMN_1231355 | E230029F23Rik | 0.0044  | 0.1422  | -2.29       |
| ILMN_2671923 | Ly86          | 0.0017  | 0.0956  | -2.29       |
| ILMN_2757966 | Cxcl4         | 0.0000  | 0.0163  | -2.28       |
| ILMN_1212938 | Aif1          | 0.0185  | 0.2175  | -2.28       |
| ILMN_1215466 | Oscar         | 0.0002  | 0.0434  | -2.27       |
| ILMN_2756665 | Cbr2          | 0.0088  | 0.1750  | -2.25       |
| ILMN_2609323 | Lst1          | 0.0031  | 0.1264  | -2.25       |
| ILMN_2743013 | Ncf4          | 0.0010  | 0.0809  | -2.24       |
| ILMN_1218181 | Ifitm6        | 0.0045  | 0.1422  | -2.23       |
| ILMN_2775030 | Folr2         | 0.0014  | 0.0919  | -2.22       |
| ILMN_2867147 | Tyrobp        | 0.0059  | 0.1562  | -2.20       |
| ILMN_2735660 | Acp5          | 0.0010  | 0.0795  | -2.19       |
| ILMN_2727432 | Stab1         | 0.0016  | 0.0938  | -2.19       |
| ILMN_2915303 | Trem3         | 0.0004  | 0.0551  | -2.18       |
| ILMN_2863837 | Alox5ap       | 0.0021  | 0.1062  | -2.17       |
| ILMN_1249486 | Mgl1          | 0.0067  | 0.1636  | -2.16       |
| ILMN_2710819 | Csf1r         | 0.0002  | 0.0420  | -2.16       |
| ILMN_2871945 | Trem1         | 0.0000  | 0.0169  | -2.14       |
| ILMN_2762966 | Siglec1       | 0.0007  | 0.0703  | -2.14       |
| ILMN_2660555 | Bcl2a1d       | 0.0036  | 0.1342  | -2.12       |
| ILMN_1216880 | Emr1          | 0.0033  | 0.1309  | -2.12       |
| ILMN_1258357 | Dok3          | 0.0008  | 0.0727  | -2.11       |
| ILMN_2865016 | Cd83          | 0.0035  | 0.1338  | -2.11       |
| ILMN_2894211 | 8430408G22Rik | 0.0087  | 0.1735  | -2.10       |
| ILMN_1256824 | Gpr171        | 0.0015  | 0.0935  | -2.10       |
| ILMN_2721149 | Arl11         | 0.0010  | 0.0809  | -2.10       |
| ILMN_2675669 | Cd72          | 0.0277  | 0.2498  | -2.10       |
| ILMN_1222269 | 1810011H11Rik | 0.0000  | 0.0187  | -2.09       |
| ILMN_2602352 | Ms4a6d        | 0.0000  | 0.0212  | -2.07       |
| ILMN_1222860 | 381484.0000   | 0.0000  | 0.0100  | -2.06       |
| ILMN_1258979 | Mcp1          | 0.0111  | 0.1850  | -2.06       |
| ILMN_2660263 | Bcl2a1b       | 0.0034  | 0.1338  | -2.05       |
| ILMN_2737903 | Fgd2          | 0.0034  | 0.1338  | -2.04       |
| ILMN_1248718 | Cma2          | 0.0148  | 0.2030  | -2.04       |
| ILMN_1228320 | Cfp           | 0.0069  | 0.1637  | -2.03       |
| ILMN_1216042 | Apoe          | 0.0004  | 0.0594  | -2.01       |
| ILMN_1230485 | Csf1r         | 0.0004  | 0.0551  | -2.00       |
| ILMN_3161652 | Clec4a3       | 0.0002  | 0.0456  | -1.99       |
| ILMN_1242739 | LOC218617     | 0.0023  | 0.1123  | -1.98       |
| ILMN_2707099 | Mal2          | 0.0154  | 0.2048  | -1.98       |
| ILMN_2855285 | Folr2         | 0.0241  | 0.2421  | -1.98       |
| ILMN_2611000 | Il1r2         | 0.0015  | 0.0935  | -1.97       |
| ILMN_2777498 | Il1b          | 0.0103  | 0.1838  | -1.96       |
| ILMN_1234223 | Pld4          | 0.0097  | 0.1824  | -1.93       |
| ILMN_2646358 | Klrb1b        | 0.0062  | 0.1606  | -1.93       |
| ILMN_2634235 | Lrrc33        | 0.0029  | 0.1239  | -1.92       |
| ILMN_1229523 | Fcgr1         | 0.0048  | 0.1447  | -1.91       |
| ILMN_2776603 | Ccl9          | 0.0031  | 0.1270  | -1.90       |
| ILMN_2847787 | Emr1          | 0.0050  | 0.1466  | -1.90       |
| ILMN_2685393 | Ccr5          | 0.0062  | 0.1606  | -1.89       |
| ILMN_1253813 | Nckap1l       | 0.0070  | 0.1637  | -1.89       |
| ILMN_2689785 | Cd68          | 0.0182  | 0.2175  | -1.89       |
| ILMN_1215791 | Alox5ap       | 0.0152  | 0.2041  | -1.88       |
| ILMN_3118707 | Sla           | 0.0045  | 0.1422  | -1.88       |

|              |                   |        |        |      |
|--------------|-------------------|--------|--------|------|
| ILMN_2847773 | OTTMUSG0000005523 | 0.0043 | 0.1407 | 1.66 |
| ILMN_2513870 | Zap70             | 0.0153 | 0.2048 | 1.65 |
| ILMN_2763002 | Eno2              | 0.0084 | 0.1730 | 1.65 |
| ILMN_2433990 | LOC100048346      | 0.0000 | 0.0212 | 1.65 |
| ILMN_1219572 | Pcnp              | 0.0034 | 0.1338 | 1.64 |
| ILMN_3047389 | Gbp2              | 0.0125 | 0.1929 | 1.63 |
| ILMN_2460094 | Wnt10a            | 0.0188 | 0.2187 | 1.63 |
| ILMN_2889832 | Serpina3h         | 0.0084 | 0.1730 | 1.63 |
| ILMN_1216020 | Oas3              | 0.0038 | 0.1375 | 1.63 |
| ILMN_2924419 | H2-Q7             | 0.0100 | 0.1831 | 1.62 |
| ILMN_2606624 | LOC100045680      | 0.0078 | 0.1693 | 1.62 |
| ILMN_2429754 | Zfp313            | 0.0001 | 0.0405 | 1.62 |
| ILMN_1226541 | 5430417J04Rik     | 0.0136 | 0.1979 | 1.62 |
| ILMN_2669856 | 9930023K05Rik     | 0.0250 | 0.2451 | 1.62 |
| ILMN_1239055 | Xdh               | 0.0093 | 0.1785 | 1.61 |
| ILMN_1254157 | Wars              | 0.0015 | 0.0935 | 1.61 |
| ILMN_1212835 | Ugt1a6a           | 0.0107 | 0.1840 | 1.61 |
| ILMN_2646052 | C4a               | 0.0069 | 0.1637 | 1.60 |
| ILMN_2835683 | EG667977          | 0.0103 | 0.1838 | 1.60 |
| ILMN_2605819 | Eqln3             | 0.0137 | 0.1982 | 1.60 |
| ILMN_1226819 | Tapbp             | 0.0137 | 0.1982 | 1.59 |
| ILMN_2684465 | 2310043J07Rik     | 0.0016 | 0.0943 | 1.58 |
| ILMN_2783223 | LOC435565         | 0.0237 | 0.2402 | 1.58 |
| ILMN_3046362 | Traf5             | 0.0035 | 0.1338 | 1.56 |
| ILMN_2535227 | Tmem45a           | 0.0209 | 0.2286 | 1.56 |
| ILMN_2619877 | Ap1m2             | 0.0087 | 0.1735 | 1.56 |
| ILMN_2434853 | mtDNA_ND2         | 0.0036 | 0.1342 | 1.56 |
| ILMN_2571934 | D030034I04Rik     | 0.0019 | 0.1028 | 1.55 |
| ILMN_1245716 | Gphb5             | 0.0002 | 0.0405 | 1.55 |
| ILMN_2727481 | Palmd             | 0.0107 | 0.1840 | 1.55 |
| ILMN_1245048 | sc10003886.1_50   | 0.0046 | 0.1425 | 1.54 |
| ILMN_3139158 | Trim21            | 0.0015 | 0.0935 | 1.54 |
| ILMN_2723920 | Itpk1             | 0.0000 | 0.0157 | 1.54 |
| ILMN_2768859 | 9530068E07Rik     | 0.0150 | 0.2037 | 1.54 |
| ILMN_1238654 | Gorasp2           | 0.0099 | 0.1830 | 1.54 |
| ILMN_2918479 | Hspa8             | 0.0034 | 0.1338 | 1.54 |
| ILMN_2777082 | P4ha2             | 0.0002 | 0.0405 | 1.54 |
| ILMN_2664929 | Cd8b1             | 0.0055 | 0.1522 | 1.53 |
| ILMN_2844671 | 3110043J09Rik     | 0.0065 | 0.1614 | 1.53 |
| ILMN_1228093 | Arhaap8           | 0.0194 | 0.2206 | 1.52 |
| ILMN_2462709 | LOC640340         | 0.0277 | 0.2496 | 1.52 |
| ILMN_2589181 | Eef2              | 0.0006 | 0.0675 | 1.52 |
| ILMN_1238612 | Rnf114            | 0.0004 | 0.0568 | 1.52 |
| ILMN_2473811 | 9626958_317       | 0.0013 | 0.0893 | 1.52 |
| ILMN_1230923 | Vldlr             | 0.0077 | 0.1677 | 1.51 |
| ILMN_2879614 | Zbp1              | 0.0185 | 0.2175 | 1.51 |
| ILMN_2538436 | LOC386270         | 0.0080 | 0.1710 | 1.51 |
| ILMN_2648230 | Kars              | 0.0149 | 0.2037 | 1.51 |
| ILMN_2711172 | Irgm1             | 0.0010 | 0.0804 | 1.51 |
| ILMN_1218525 | Il18r1            | 0.0179 | 0.2157 | 1.51 |
| ILMN_2616556 | Cttnnb1           | 0.0113 | 0.1867 | 1.51 |
| ILMN_1221640 | Gabrr             | 0.0065 | 0.1614 | 1.51 |
| ILMN_2441724 | 9430014F16Rik     | 0.0097 | 0.1824 | 1.51 |
| ILMN_2705407 | Pabpc1            | 0.0070 | 0.1637 | 1.51 |
| ILMN_2776911 | Prei3             | 0.0001 | 0.0274 | 1.50 |
| ILMN_3155492 | Tapbp             | 0.0045 | 0.1422 | 1.50 |
| ILMN_1221149 | 9626100_15        | 0.0017 | 0.0956 | 1.50 |
| ILMN_2971479 | Trp53inp1         | 0.0003 | 0.0551 | 1.50 |
| ILMN_2927373 | Ddit3             | 0.0026 | 0.1185 | 1.50 |

|              |                        |        |        |       |
|--------------|------------------------|--------|--------|-------|
| ILMN_2501489 | Was                    | 0.0043 | 0.1400 | -1.88 |
| ILMN_1220101 | Ebi2                   | 0.0063 | 0.1612 | -1.87 |
| ILMN_1230587 | Lpxn                   | 0.0134 | 0.1979 | -1.87 |
| ILMN_1230708 | Clec4a1                | 0.0001 | 0.0405 | -1.86 |
| ILMN_1219946 | Il10ra                 | 0.0079 | 0.1702 | -1.85 |
| ILMN_2829457 | Ncf1                   | 0.0008 | 0.0764 | -1.85 |
| ILMN_2992709 | Trem2                  | 0.0068 | 0.1637 | -1.85 |
| ILMN_2609590 | Cpa3                   | 0.0080 | 0.1705 | -1.85 |
| ILMN_1240615 | Olfm1                  | 0.0004 | 0.0554 | -1.84 |
| ILMN_1248139 | Gp49a                  | 0.0152 | 0.2037 | -1.84 |
| ILMN_3154691 | Sirpb1                 | 0.0017 | 0.0958 | -1.84 |
| ILMN_1242474 | Rab3il1                | 0.0034 | 0.1338 | -1.83 |
| ILMN_1217041 | Cd86                   | 0.0256 | 0.2465 | -1.83 |
| ILMN_1251669 | Evi2a                  | 0.0056 | 0.1526 | -1.83 |
| ILMN_1231284 | LOC100047132           | 0.0198 | 0.2231 | -1.82 |
| ILMN_2718589 | Fcna                   | 0.0006 | 0.0675 | -1.82 |
| ILMN_1251390 | Tbxas1                 | 0.0043 | 0.1400 | -1.81 |
| ILMN_1246056 | Gngt2                  | 0.0057 | 0.1545 | -1.81 |
| ILMN_2959191 | Inpp5d                 | 0.0015 | 0.0935 | -1.81 |
| ILMN_2765759 | Asb2                   | 0.0006 | 0.0667 | -1.80 |
| ILMN_2649392 | Fermt3                 | 0.0094 | 0.1806 | -1.80 |
| ILMN_2700848 | Arrb2                  | 0.0000 | 0.0157 | -1.80 |
| ILMN_3160107 | Plk3r6                 | 0.0006 | 0.0662 | -1.80 |
| ILMN_1228213 | Ifi30                  | 0.0040 | 0.1400 | -1.80 |
| ILMN_1235139 | Sfp1                   | 0.0003 | 0.0510 | -1.79 |
| ILMN_1252370 | Wdr92                  | 0.0254 | 0.2460 | -1.79 |
| ILMN_2635801 | 2310079N02Rik          | 0.0000 | 0.0060 | -1.78 |
| ILMN_1227907 | Gmfg                   | 0.0168 | 0.2098 | -1.77 |
| ILMN_2416628 | Cyth4                  | 0.0025 | 0.1177 | -1.77 |
| ILMN_2699531 | Rgs10                  | 0.0006 | 0.0662 | -1.76 |
| ILMN_2936165 | Bcl2a1c                | 0.0131 | 0.1963 | -1.76 |
| ILMN_1235934 | Btk                    | 0.0200 | 0.2238 | -1.73 |
| ILMN_1249688 | Tnfrsf8                | 0.0016 | 0.0943 | -1.73 |
| ILMN_1257855 | Stard8                 | 0.0012 | 0.0842 | -1.73 |
| ILMN_3160218 | Amica1                 | 0.0099 | 0.1830 | -1.73 |
| ILMN_1253544 | 2900060B14Rik          | 0.0198 | 0.2231 | -1.72 |
| ILMN_2663130 | P2ry6                  | 0.0008 | 0.0727 | -1.72 |
| ILMN_1235399 | Mcpst8                 | 0.0107 | 0.1840 | -1.71 |
| ILMN_1230099 | Defcr20                | 0.0037 | 0.1374 | -1.71 |
| ILMN_2534201 | A430084P05Rik          | 0.0149 | 0.2033 | -1.71 |
| ILMN_1230287 | 4732429D16Rik          | 0.0123 | 0.1917 | -1.70 |
| ILMN_2641678 | Bdh2                   | 0.0023 | 0.1127 | -1.70 |
| ILMN_1231204 | LOC270152              | 0.0080 | 0.1705 | -1.70 |
| ILMN_2692696 | Pla2g7                 | 0.0004 | 0.0594 | -1.69 |
| ILMN_2789948 | Arhgdib                | 0.0180 | 0.2163 | -1.69 |
| ILMN_2878979 | Tnfrsf8                | 0.0052 | 0.1481 | -1.69 |
| ILMN_2727663 | Tgfb1                  | 0.0045 | 0.1422 | -1.69 |
| ILMN_2956092 | Rassf4                 | 0.0087 | 0.1735 | -1.68 |
| ILMN_2638509 | LOC639715              | 0.0157 | 0.2067 | -1.68 |
| ILMN_2604521 | Cotl1                  | 0.0000 | 0.0169 | -1.68 |
| ILMN_3152792 | Pira11                 | 0.0003 | 0.0488 | -1.67 |
| ILMN_3102376 | Fcgr2b                 | 0.0272 | 0.2486 | -1.67 |
| ILMN_1225406 | Ccl24                  | 0.0165 | 0.2082 | -1.67 |
| ILMN_1243329 | Dab2                   | 0.0004 | 0.0603 | -1.67 |
| ILMN_2593787 | Kcnk13                 | 0.0006 | 0.0675 | -1.67 |
| ILMN_1217629 | Itgae                  | 0.0012 | 0.0870 | -1.67 |
| ILMN_2767605 | Lmo2                   | 0.0101 | 0.1831 | -1.66 |
| ILMN_2601946 | 5033414K04Rik          | 0.0183 | 0.2175 | -1.65 |
| ILMN_1222471 | Gmfg                   | 0.0217 | 0.2316 | -1.65 |
| ILMN_1220609 | Ltb4r1                 | 0.0218 | 0.2319 | -1.64 |
| ILMN_2685392 | Ccr5                   | 0.0199 | 0.2232 | -1.64 |
| ILMN_2962737 | Aoah                   | 0.0202 | 0.2248 | -1.64 |
| ILMN_2769191 | Tbxas1                 | 0.0234 | 0.2399 | -1.64 |
| ILMN_1225085 | Prkcb                  | 0.0179 | 0.2157 | -1.64 |
| ILMN_1250704 | Rcsd1                  | 0.0021 | 0.1062 | -1.64 |
| ILMN_2998807 | Stard8                 | 0.0186 | 0.2175 | -1.64 |
| ILMN_2619707 | Sico2b1                | 0.0029 | 0.1239 | -1.63 |
| ILMN_3008859 | Ctsc                   | 0.0022 | 0.1106 | -1.63 |
| ILMN_1248347 | Nfam1                  | 0.0059 | 0.1577 | -1.63 |
| ILMN_1242391 | Tmem8                  | 0.0244 | 0.2428 | -1.63 |
| ILMN_1258571 | Sp6                    | 0.0184 | 0.2175 | -1.62 |
| ILMN_2948552 | Xcl1                   | 0.0225 | 0.2350 | -1.62 |
| ILMN_2664202 | Rarres1                | 0.0121 | 0.1906 | -1.62 |
| ILMN_2856926 | Gpr114                 | 0.0208 | 0.2286 | -1.61 |
| ILMN_1220996 | Ptpn6                  | 0.0243 | 0.2426 | -1.61 |
| ILMN_2918977 | 41334.0000             | 0.0115 | 0.1873 | -1.60 |
| ILMN_3091641 | Dab2                   | 0.0011 | 0.0839 | -1.60 |
| ILMN_2954575 | Arhaap30               | 0.0011 | 0.0809 | -1.59 |
| ILMN_2473066 | LOC100047419           | 0.0037 | 0.1368 | -1.59 |
| ILMN_2600678 | Rac2                   | 0.0233 | 0.2394 | -1.59 |
| ILMN_2658687 | Ltc4s                  | 0.0075 | 0.1664 | -1.59 |
| ILMN_3149776 | B3qnt8                 | 0.0104 | 0.1838 | -1.59 |
| ILMN_1258242 | 2310031L18Rik          | 0.0055 | 0.1522 | -1.58 |
| ILMN_3154419 | P2ry14                 | 0.0027 | 0.1192 | -1.58 |
| ILMN_2920849 | Pira4                  | 0.0059 | 0.1562 | -1.58 |
| ILMN_2699898 | Itgae                  | 0.0002 | 0.0405 | -1.58 |
| ILMN_2919411 | Osm                    | 0.0042 | 0.1400 | -1.57 |
| ILMN_2709337 | Sp6                    | 0.0159 | 0.2067 | -1.57 |
| ILMN_2614889 | B3qnt8                 | 0.0010 | 0.0809 | -1.57 |
| ILMN_2630459 | Cxcr4                  | 0.0183 | 0.2175 | -1.57 |
| ILMN_2960108 | Cyp27a1                | 0.0001 | 0.0242 | -1.57 |
| ILMN_1239963 | Snx20                  | 0.0196 | 0.2217 | -1.56 |
| ILMN_1224077 | Vav1                   | 0.0236 | 0.2399 | -1.56 |
| ILMN_2889020 | Ltf                    | 0.0264 | 0.2478 | -1.55 |
| ILMN_1241350 | Vsig4                  | 0.0061 | 0.1605 | -1.55 |
| ILMN_2737685 | Mmp13                  | 0.0121 | 0.1906 | -1.54 |
| ILMN_2714638 | Mertk                  | 0.0016 | 0.0943 | -1.54 |
| ILMN_2589640 | Ednrb                  | 0.0101 | 0.1831 | -1.54 |
| ILMN_1213274 | Ydjc                   | 0.0023 | 0.1123 | -1.54 |
| ILMN_1245816 | Raet1b                 | 0.0021 | 0.1062 | -1.53 |
| ILMN_1257631 | Apobec1                | 0.0007 | 0.0703 | -1.53 |
| ILMN_2697304 | Eln                    | 0.0165 | 0.2082 | -1.53 |
| ILMN_2693991 | Gpr65                  | 0.0002 | 0.0405 | -1.53 |
| ILMN_2696017 | Itgam                  | 0.0014 | 0.0928 | -1.53 |
| ILMN_2774332 | Msx3                   | 0.0032 | 0.1293 | -1.53 |
| ILMN_1219516 | TRGV6_D29793_T_cell_re | 0.0055 | 0.1522 | -1.52 |

**Table S1.** Gene lists from array analysis are depicted. Lists were selected by fold change  $>$  or  $<$  1.5, p-value  $<0.05$ , and q-value  $<0.25$ . n=6 mice/group for a total of 12 arrays.

## **Additional Supplemental Methods**

*Fluorescence-Activated Cell Sorting (FACS).* Cell suspension and antibody staining were prepared as described above. Sorting was performed using the FACS Aria-II cell sorter (BD Biosciences) at the FACS Core of Washington University Department of Pathology and Immunology. For gene expression analysis, cells were directly sorted into the TRK lysis buffer (Omega). For all sorting experiments, post-sort analyses were performed to ensure >90% purity.

*Gene Signature Survival Analysis.* The full gene lists were matched for human-mouse ortholog by the provided gene symbols for human genome annotation (gene symbol and entrez ID); some genes are missing the annotation. The genes with human genome annotation were matched in the public datasets and their expression was matched with clinical outcomes. We used GSE1501 for survival analysis (21). For each individual gene, the Kaplan-Meier (KM) survival curves on the binary gene expression (dichotomized by median as low/high) were generated with log-rank test p-values while Cox proportional hazard model was fitted on the continuous gene expression to estimate the hazard ratio with a Wald test P-value. Top prognostic individual genes included ZBP1, OAS3, PTPN6, SFPI1, IRF9, CDH13, SIGLEC1, STAT1, SLC11A1, SH2D2A etc. The up-regulated genes and the down-regulated genes were each centered by mean and scaled by standard deviation. The averaged expression of down-regulated genes (all available genes or the significant genes only from the previous individual gene analysis based on either log-rank test or Wald test  $p < 0.05$ ) were separately calculated. Each sample was categorized into low/high expression by the median of the averaged gene expression. The resulting group classification was associated with overall survival (OS) by KM analysis and log-rank test.

1. Stratford, J.K., *et al.* A six-gene signature predicts survival of patients with localized pancreatic ductal adenocarcinoma. *PLoS Med* 7, e1000307 (2010).
